# Supplementary material
Source: PubMed Central journal article supplement (PMC4607616)
Supplement: 15_099_Yasuda_Suppl.pdf [file 15_099_Yasuda_Suppl.pdf]

Supplemental Data

Liver Transplantation for Acute Intermittent Porphyria: Biochemical and Pathologic Studies of the Explanted Liver

Makiko Yasuda,<sup>1\*</sup> Angelika L Erwin,<sup>1\*</sup> Lawrence U Liu,<sup>2\*</sup> Manisha Balwani,<sup>1,2</sup> Brenden Chen,<sup>1</sup> Senkottuvelan Kadirvel,<sup>1</sup> Lin Gan,<sup>1</sup> M Isabel Fiel,<sup>3</sup> Ronald E Gordon,<sup>3</sup> Chunli Yu,<sup>1</sup> Sonia Clavero,<sup>1</sup> Antonios Arvelakis,<sup>4</sup> Hetanshi Naik,<sup>1</sup> L David Martin,<sup>5</sup> John D Phillips,<sup>6</sup> Karl E Anderson,<sup>7</sup> Vaithamanithi M Sadagoparamanujam,<sup>7</sup> Sander S Florman,<sup>2,4</sup> and Robert J Desnick<sup>1</sup>

Online address: <http://www.molmed.org>

The Feinstein Institute for Medical Research  
North Shore LIJ  
Empowering Imagination. Pioneering Discovery.®

Supplementary Table S1. Instrument and furnace specifications for iron quantification.

| Specification                      | Value or Description                  |
|------------------------------------|---------------------------------------|
| Lamp                               | High intensity-boosted hollow cathode |
| Lamp current (mA)                  | 10                                    |
| Wavelength (nm)                    | 248.3                                 |
| Slit width (nm)                    | 0.2                                   |
| Graphite tube and site             | Pyrolytically coated                  |
| Matrix modifier                    | None                                  |
| Furnace temperature program steps: |                                       |
| Drying                             | 85°C x 5 s; gas flow 0.3 L/min        |
| Drying                             | 95°C x 50 s; gas flow 0.3 L/min       |
| Drying                             | 120°C x 10 s; gas flow 0.3 L/min      |
| Pyrolysis                          | 800°C x 10 s; gas flow 0.3 L/min      |
|                                    | 800°C x 2 s; no gas flow              |
| Atomization                        | 2300°C x 0.8 s; gas flow 0.3 L/min    |
|                                    | 2300°C x 2.0 s; no gas flow           |
|                                    | 2300°C x 2.0 s; gas flow 0.3 L/min    |

Supplementary Table S2. Relative mRNA expression levels of selected pro-inflammatory cytokines in AIP and control livers.

| Gene  | Control (n = 5) | AIP (n = 1) |
|-------|-----------------|-------------|
| IL-1β | 1 ± 1.3         | 4.3 ± 0.1   |
| IL-6  | 1 ± 2.0         | 2.4 ± 0.1   |
| TNFα  | 1 ± 1.2         | 2.7 ± 0.5   |

Data are reported as means ± SDs derived from three technical replicates. IL-1β, interleukin 1β; IL-6, interleukin 6; TNFα, tumor necrosis factor α.

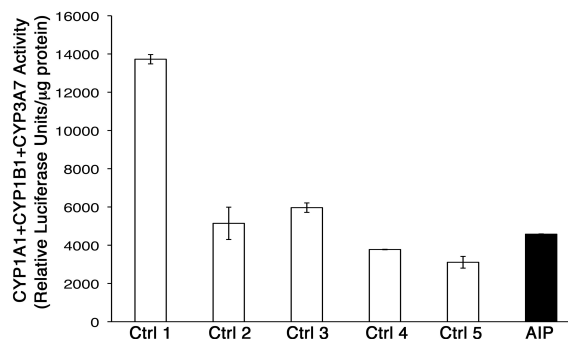

Supplementary Figure S1. Combined CYP1A1, CYP1B1, and CYP3A7 activities in AIP and control livers. Combined activities of CYP1A1, CYP1B1, and CYP3A7 in the five different controls (ctrl) and the AIP liver are shown as means ± SDs, derived from two technical replicates.
